# Supplementary material for: A 10-year Population-based Study of the Differences between NECs and Carcinomas of the Esophagus in Terms of Clinicopathology and Survival
Source: PubMed Central journal article supplement — J Cancer. 2019 Feb 26;10(6):1520–7. doi: 10.7150/jca.29483 (PMC6485230; doi:10.7150/jca.29483), 2019-02-26
Supplement: jcav10p1520s1.pdf [file jcav10p1520s1.pdf]

**S Table1 Clinical features of including patients**

|                                  | Neuroendocrine carcinoma (%) | Squamous cell carcinoma (%) | Adenocarcinoma (%) | P-value |
|----------------------------------|------------------------------|-----------------------------|--------------------|---------|
| <b>Median survival (month)</b>   | 7.81                         | 9.24                        | 11.19              |         |
| <b>Gender</b>                    |                              |                             |                    | <0.01   |
| <b>Female</b>                    | 71 (28.86)                   | 1972 (32.32)                | 1534 (14.14)       |         |
| <b>Male</b>                      | 175 (71.14)                  | 4130 (67.68)                | 9314 (85.86)       |         |
| <b>Age</b>                       |                              |                             |                    |         |
| <b>Mean age</b>                  | 66.65                        | 67.19                       | 66.10              |         |
| <b>&lt;66 year-old</b>           | 117 (47.56)                  | 2807 (46.00)                | 5418 (49.94)       |         |
| <b>&gt;=66 year-old</b>          | 129 (52.44)                  | 3295 (54.00)                | 5430 (50.06)       |         |
| <b>Location</b>                  |                              |                             |                    | <0.01   |
| <b>Upper third of esophagus</b>  | 13 (5.28)                    | 976 (15.99)                 | 125 (1.15)         |         |
| <b>Middle third of esophagus</b> | 61 (24.80)                   | 2365 (38.76)                | 870 (8.02)         |         |
| <b>Lower third of esophagus</b>  | 130 (52.85)                  | 1779 (29.15)                | 8435 (77.76)       |         |
| <b>Unspecific</b>                | 42 (17.07)                   | 982 (16.09)                 | 1418 (13.07)       |         |
| <b>Grade</b>                     |                              |                             |                    | <0.01   |
| <b>I</b>                         | 1 (0.41)                     | 195 (3.20)                  | 379 (3.49)         |         |
| <b>II</b>                        | 2 (0.81)                     | 2252 (36.91)                | 3487 (32.14)       |         |
| <b>III</b>                       | 125 (50.81)                  | 2453 (40.20)                | 5141 (47.39)       |         |
| <b>IV</b>                        | 50 (20.33)                   | 47 (0.77)                   | 136 (1.25)         |         |
| <b>Unspecific</b>                | 68 (27.64)                   | 1155 (18.93)                | 1705 (15.72)       |         |
| <b>Tumorsize</b>                 |                              |                             |                    | <0.01   |
| <b>&lt;2cm</b>                   | 15 (6.10)                    | 312 (5.11)                  | 666 (6.14)         |         |

|                        |                   |             |              |              |       |
|------------------------|-------------------|-------------|--------------|--------------|-------|
|                        | <b>2-3cm</b>      | 9 (3.66)    | 416 (6.82)   | 727 (6.70)   |       |
|                        | <b>3-4cm</b>      | 16 (6.50)   | 515 (8.44)   | 878 (8.09)   |       |
|                        | <b>4-5cm</b>      | 14 (5.69)   | 601 (9.85)   | 1024 (9.44)  |       |
|                        | <b>5-6cm</b>      | 19 (7.72)   | 453 (7.42)   | 670 (6.18)   |       |
|                        | <b>6-7cm</b>      | 22 (8.94)   | 291 (4.77)   | 483 (4.45)   |       |
|                        | <b>7-8cm</b>      | 10 (4.07)   | 263 (4.31)   | 392 (3.61)   |       |
|                        | <b>&gt;8cm</b>    | 28 (11.38)  | 501 (8.21)   | 726 (6.69)   |       |
|                        | <b>Unspecific</b> | 113 (45.93) | 2750 (45.07) | 5282 (48.69) |       |
| <b>Tstage</b>          |                   |             |              |              | <0.01 |
|                        | <b>T0</b>         | 0 (0.00)    | 4 (0.07)     | 5 (0.05)     |       |
|                        | <b>T1</b>         | 62 (25.20)  | 1561 (25.58) | 2530 (23.32) |       |
|                        | <b>T2</b>         | 12 (4.88)   | 380 (6.23)   | 838 (7.72)   |       |
|                        | <b>T3</b>         | 36 (14.63)  | 1335 (21.88) | 3075 (28.35) |       |
|                        | <b>T4</b>         | 50 (20.33)  | 1227 (20.11) | 1439 (13.27) |       |
|                        | <b>Unspecific</b> | 86 (34.96)  | 1595 (26.14) | 2961 (27.30) |       |
| <b>Nstage</b>          |                   |             |              |              | <0.01 |
|                        | <b>N0</b>         | 74 (30.08)  | 2305 (37.77) | 3621 (33.38) |       |
|                        | <b>N1</b>         | 114 (46.34) | 2689 (44.07) | 5113 (47.13) |       |
|                        | <b>N2</b>         | 4 (1.63)    | 197 (3.23)   | 409 (3.77)   |       |
|                        | <b>Unspecific</b> | 54 (21.95)  | 911 (14.93)  | 1705 (15.72) |       |
| <b>Mstage</b>          |                   |             |              |              | <0.01 |
|                        | <b>M0</b>         | 80 (32.52)  | 3583 (58.72) | 5062 (46.66) |       |
|                        | <b>M1</b>         | 153 (62.20) | 2147 (35.19) | 5313 (48.98) |       |
|                        | <b>Unspecific</b> | 13 (5.28)   | 372 (6.10)   | 473 (4.36)   |       |
| <b>Metastasis site</b> |                   |             |              |              | <0.01 |

|                                            |              |              |               |       |
|--------------------------------------------|--------------|--------------|---------------|-------|
| <b>Liver</b>                               | 45 (29.41)   | 313 (14.58)  | 1228 (23.11)  |       |
| <b>Lung</b>                                | 14 (9.15)    | 340 (15.84)  | 575 (10.82)   |       |
| <b>Brain</b>                               | 5 (3.27)     | 24 (1.12)    | 161 (3.03)    |       |
| <b>Bone</b>                                | 15 (9.80)    | 209 (9.73)   | 561 (10.56)   |       |
| <b>Distant lymph nodes</b>                 | 19 (12.42)   | 330 (15.37)  | 702 (13.21)   |       |
| <b>Primary site surgery</b>                |              |              |               | <0.01 |
| <b>Yes</b>                                 | 15 (6.10)    | 625 (10.24)  | 2116 (19.51)  |       |
| <b>No</b>                                  | 231 (93.9)   | 5477 (89.76) | 8732 (80.49)  |       |
| <b>Lymph node dissection</b>               |              |              |               | <0.01 |
| <b>Yes</b>                                 | 10 (4.07)    | 570 (9.34)   | 1979 (18.24)  |       |
| <b>No</b>                                  | 236 (95.93)  | 5532 (90.66) | 8869 (81.76)  |       |
| <b>Distant metastasis sites dissection</b> |              |              |               | <0.01 |
| <b>Yes</b>                                 | 0 (0)        | 4 (0.07)     | 12 (0.11)     |       |
| <b>No</b>                                  | 246 (100.00) | 6098 (99.93) | 10836 (99.89) |       |

---

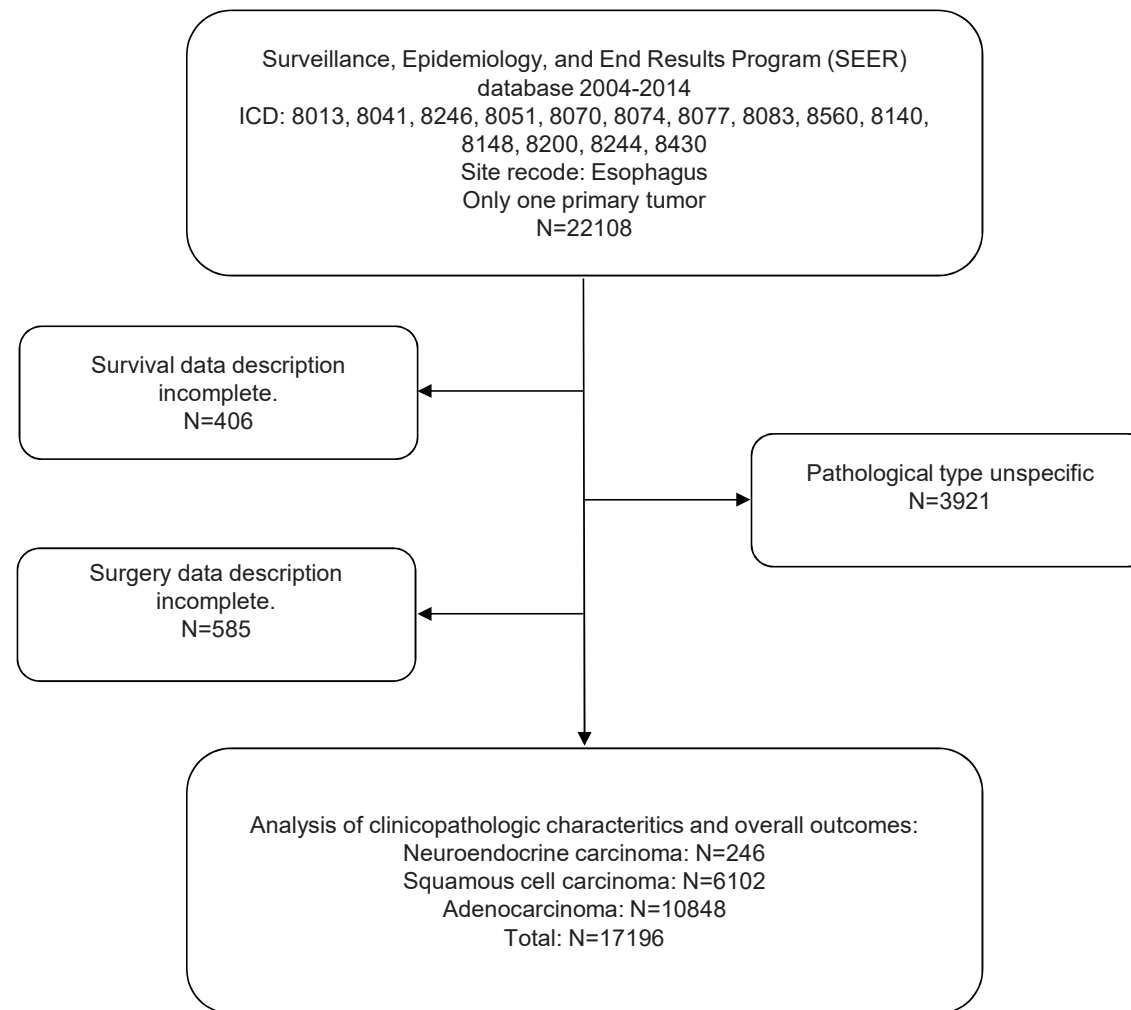

Supplementary Figure 1: Flow chart depicting the selection of patients.

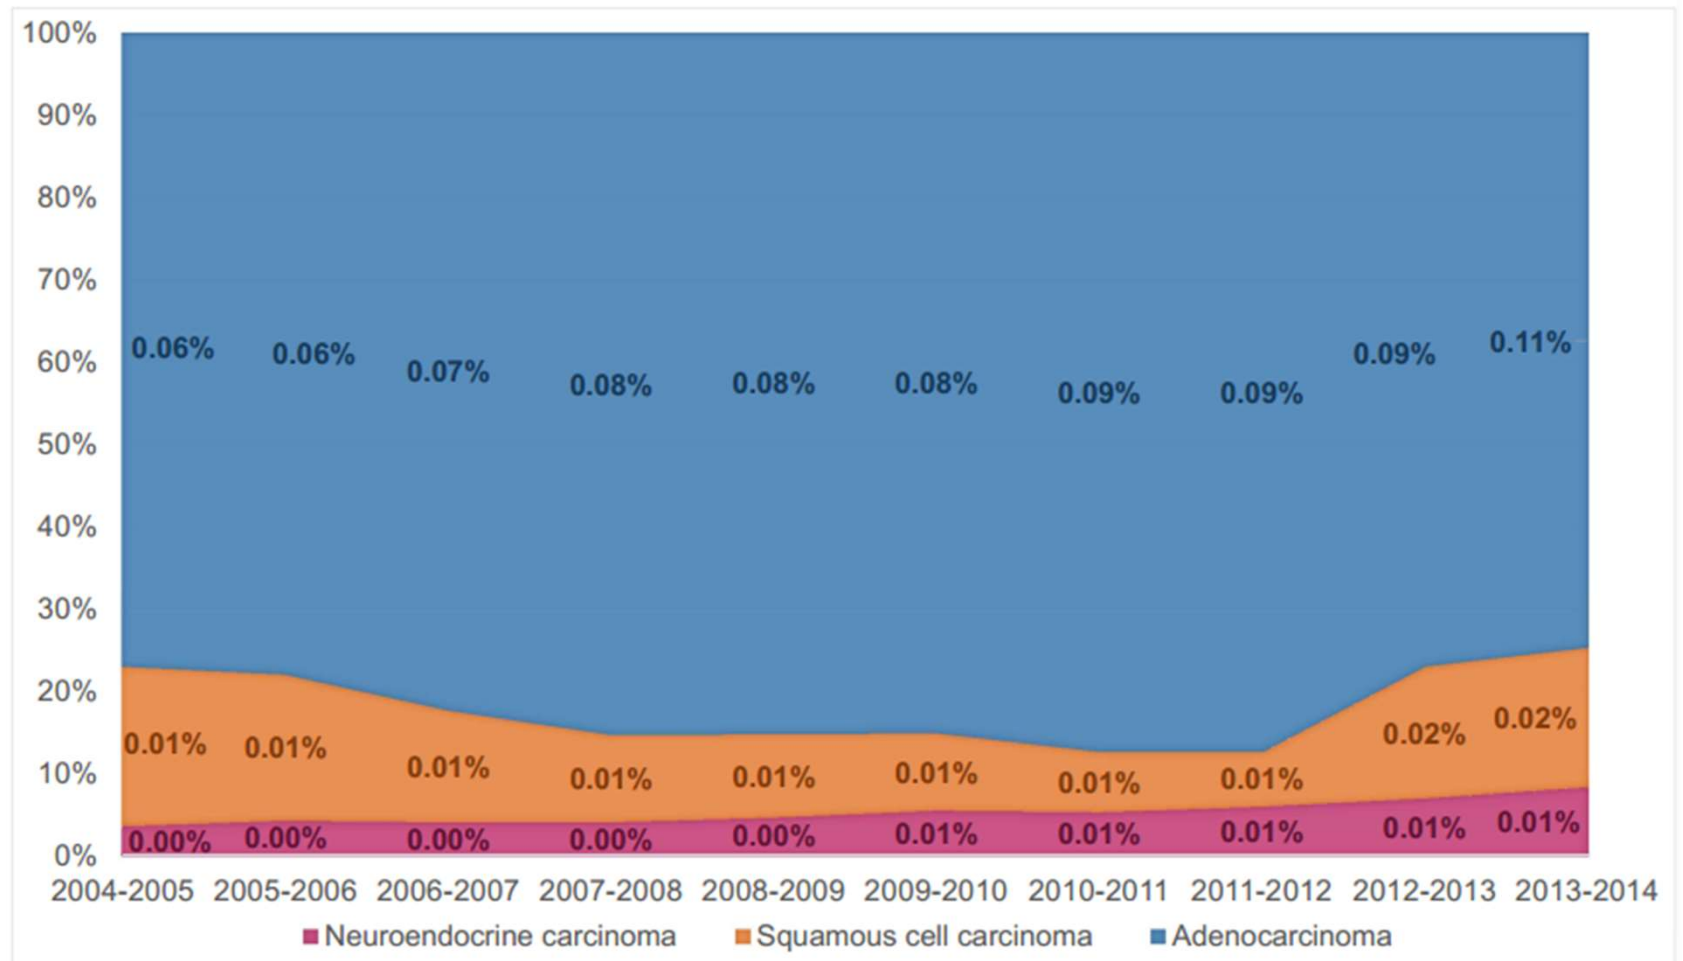

Supplementary Figure 2: The prevalence of three main kinds of esophageal cancer during 2004-2014.

\*: The percentage in the Y-axis represents the proportion of three esophageal cancer and the percentage in the graph represents the prevalence of each cancer.
